# Supplementary material
Source: publisher figshare collection journal article supplement (https://acs.figshare.com/ndownloader/files/4366615)
Supplement: Supplementary file 1 [file 4366615]

data_publication_text
_publ_requested_journal          
'Journal of Organic Chemistry'
_publ_contact_author_name        'Simon E. Lawrence'
_publ_contact_author_address     
;Department of Chemistry 
Analytical and Biological Chemistry Research Facility
University College Cork
Cork
Ireland
;
_publ_contact_author_email       s.lawrence@ucc.ie
_publ_contact_author_phone       +353(21)4903143
_publ_contact_author_fax         +353(21)4274097
loop_
_publ_author_name
_publ_author_address
'Eccles, Kevin. S.'
;Department of Chemistry
Analytical and Biological Chemistry Research Facility
University College Cork
Cork
Ireland
;
'Deasy, Rebecca, E.'
;Department of Chemistry
Analytical and Biological Chemistry Research Facility
University College Cork
Cork
Ireland
;
'Fabian, Laszlo'
;Department of Chemistry
Analytical and Biological Chemistry Research Facility
University College Cork
Cork
Ireland
;
'Maguire, Anita R.'
;Department of Chemistry & School of Pharmacy 
Analytical and Biological Chemistry Research Facility
University College Cork
Cork
Ireland
;
'Lawrence, Simon E.'
;Department of Chemistry
Analytical and Biological Chemistry Research Facility
University College Cork
Cork
Ireland
;
_publ_section_title                     
;
The Use of Co-crystals for the Determination of Absolute 
Stereochemistry: An Alternative to Salt Formation
;
#===================================================================== 
data_Compound_2d_(S)
_audit_creation_method                  'APEX2 v2010.1-2'

_chemical_name_systematic               ?
_chemical_name_common                   ?
_chemical_formula_moiety                'C10 H11 F O2, C6 H6 N2 O'
_chemical_formula_sum                   'C16 H17 F N2 O3'
_chemical_formula_iupac                 ?
_chemical_formula_weight                304.32
_chemical_absolute_configuration        ad

_chemical_melting_point                 '363-365'

_space_group_crystal_system             triclinic
_space_group_name_H-M_alt               'P 1'
_space_group_name_Hall                  'P 1'
loop_
    _space_group_symop_operation_xyz
    'x, y, z'

_cell_length_a                          8.8898(4)
_cell_length_b                          12.0610(5)
_cell_length_c                          15.2167(7)
_cell_angle_alpha                       72.416(2)
_cell_angle_beta                        81.661(3)
_cell_angle_gamma                       75.268(3)
_cell_volume                            1500.05(11)
_cell_formula_units_Z                   4
_cell_measurement_reflns_used           9933
_cell_measurement_theta_min             3.9443
_cell_measurement_theta_max             65.3461
_cell_measurement_temperature           100.(2)

_exptl_crystal_description              block
_exptl_crystal_colour                   colourless
_exptl_crystal_size_max                 0.50
_exptl_crystal_size_mid                 0.43
_exptl_crystal_size_min                 0.20
_exptl_crystal_density_diffrn           1.347
_exptl_crystal_density_meas             ?
_exptl_crystal_density_method           'not measured'
_exptl_crystal_F_000                    640

_exptl_absorpt_coefficient_mu           0.855
_exptl_absorpt_correction_type          multi-scan
_exptl_absorpt_process_details          'SADABS V2008/1 (Bruker AXS)'
_exptl_absorpt_correction_T_min         0.6394
_exptl_absorpt_correction_T_max         0.7527

_exptl_special_details                  
;
; 

_diffrn_ambient_temperature             100.(2)

_diffrn_radiation_type                  CuK\a
_diffrn_radiation_wavelength            1.54178
_diffrn_radiation_source          'micro-focus sealed tube'
_diffrn_radiation_monochromator   'doubly curved silicon crystal'

_diffrn_measurement_device_type         'Bruker APEX DUO'
_diffrn_measurement_method              '\w and \f scans'

_diffrn_detector_area_resol_mean        8.3333

_diffrn_reflns_number                   23873
_diffrn_reflns_av_R_equivalents         0.0334
_diffrn_reflns_av_sigmaI/netI           0.0381
_diffrn_reflns_theta_min                3.05
_diffrn_reflns_theta_max                65.81
_diffrn_reflns_theta_full               65.81
_diffrn_measured_fraction_theta_max     0.973
_diffrn_measured_fraction_theta_full    0.973
_diffrn_reflns_limit_h_min              -10
_diffrn_reflns_limit_h_max              10
_diffrn_reflns_limit_k_min              -14
_diffrn_reflns_limit_k_max              14
_diffrn_reflns_limit_l_min              -17
_diffrn_reflns_limit_l_max              16

_refine_special_details                 
;
Refinement of F^2^ against ALL reflections.  The weighted R-factor wR and
goodness of fit S are based on F^2^, conventional R-factors R are based
on F, with F set to zero for negative F^2^. The threshold expression of
F^2^ > 2sigma(F^2^) is used only for calculating R-factors(gt) etc. and is
not relevant to the choice of reflections for refinement.  R-factors based
on F^2^ are statistically about twice as large as those based on F, and R-
factors based on ALL data will be even larger.
;

_reflns_number_total                    8800
_reflns_number_gt                       8147
_reflns_threshold_expression            >2sigma(I)

_refine_ls_structure_factor_coef        Fsqd
_refine_ls_matrix_type                  full
_refine_ls_R_factor_all                 0.0398
_refine_ls_R_factor_gt                  0.0356
_refine_ls_wR_factor_gt                 0.0890
_refine_ls_wR_factor_ref                0.0928
_refine_ls_goodness_of_fit_ref          1.034
_refine_ls_restrained_S_all             1.034
_refine_ls_number_reflns                8800
_refine_ls_number_parameters            837
_refine_ls_number_restraints            3
_refine_ls_hydrogen_treatment           mixed
_refine_ls_weighting_scheme             calc
_refine_ls_weighting_details
    'calc w=1/[\s^2^(Fo^2^)+(0.0582P)^2^+0.1553P] where P=(Fo^2^+2Fc^2^)/3'

_atom_sites_solution_hydrogens          geom
_atom_sites_solution_primary            direct
_atom_sites_solution_secondary          difmap

_refine_ls_shift/su_max                 0.000
_refine_ls_shift/su_mean                0.000
_refine_diff_density_max                0.186
_refine_diff_density_min                -0.235
_refine_ls_extinction_method            none
_refine_ls_extinction_coef              ?
_refine_ls_abs_structure_details        
    'Flack H D (1983), Acta Cryst. A39, 876-881'
_refine_ls_abs_structure_Flack          -0.10(9)

loop_
    _atom_type_symbol
    _atom_type_description
    _atom_type_scat_dispersion_real
    _atom_type_scat_dispersion_imag
    _atom_type_scat_source
    C C 0.0181 0.0091 'International Tables Vol C Tables 4.2.6.8 and 6.1.1.4'
    H H 0.0000 0.0000 'International Tables Vol C Tables 4.2.6.8 and 6.1.1.4'
    N N 0.0311 0.0180 'International Tables Vol C Tables 4.2.6.8 and 6.1.1.4'
    O O 0.0492 0.0322 'International Tables Vol C Tables 4.2.6.8 and 6.1.1.4'
    F F 0.0727 0.0534 'International Tables Vol C Tables 4.2.6.8 and 6.1.1.4'

_computing_data_collection   
  'Bruker Instrument Service v2009, 7, 0, 0'
_computing_cell_refinement              'SAINT V7.66A (Bruker AXS, 2009)'
_computing_data_reduction               'SAINT V7.66A (Bruker AXS, 2009)'
_computing_structure_solution           'SHELXS-97 (Sheldrick, 2008)'
_computing_structure_refinement         'SHELXL-97 (Sheldrick, 2008)'
_computing_molecular_graphics     	'Mercury 2.3 (Macrae et al, 2008)' 
_computing_publication_material         ?

loop_
    _atom_site_type_symbol
    _atom_site_label
    _atom_site_fract_x
    _atom_site_fract_y
    _atom_site_fract_z
    _atom_site_U_iso_or_equiv
    _atom_site_adp_type
    _atom_site_calc_flag
    _atom_site_refinement_flags
    _atom_site_occupancy
    _atom_site_disorder_assembly
    _atom_site_disorder_group
    C C1 0.2188(3) 0.5213(2) 0.59183(18) 0.0288(5) Uani d . 1 . .
    C C4 0.2795(3) 0.5934(2) 0.7467(2) 0.0364(6) Uani d . 1 . .
    H H4A 0.3069 0.6434 0.7794 0.055 Uiso calc R 1 . .
    H H4B 0.3685 0.5689 0.7053 0.055 Uiso calc R 1 . .
    H H4C 0.2525 0.5225 0.7917 0.055 Uiso calc R 1 . .
    C C2 0.0852(3) 0.5873(2) 0.64314(19) 0.0323(6) Uani d . 1 . .
    H H2A 0.0342 0.5289 0.6904 0.039 Uiso calc R 1 . .
    H H2B 0.007 0.6388 0.5992 0.039 Uiso calc R 1 . .
    C C3 0.1399(3) 0.66427(19) 0.69023(17) 0.0296(5) Uani d . 1 . .
    H H3 0.1739 0.7311 0.6407 0.036 Uiso calc R 1 . .
    O O5 0.2595(2) 0.40656(14) 0.63438(12) 0.0318(4) Uani d . 1 . .
    O O6 0.2845(2) 0.56944(14) 0.52015(13) 0.0375(4) Uani d . 1 . .
    C C10 -0.2274(3) 0.8182(2) 0.86138(18) 0.0330(6) Uani d . 1 . .
    C C12 -0.0512(3) 0.6483(2) 0.83132(18) 0.0321(6) Uani d . 1 . .
    H H12 -0.0092 0.5647 0.8483 0.039 Uiso calc R 1 . .
    C C8 -0.0598(3) 0.8404(2) 0.72455(18) 0.0308(5) Uani d . 1 . .
    H H8 -0.024 0.8899 0.6681 0.037 Uiso calc R 1 . .
    C C9 -0.1781(3) 0.8903(2) 0.7813(2) 0.0348(6) Uani d . 1 . .
    H H9 -0.2234 0.9734 0.7641 0.042 Uiso calc R 1 . .
    C C11 -0.1683(3) 0.6965(2) 0.88834(18) 0.0329(6) Uani d . 1 . .
    H H11 -0.2068 0.6476 0.9442 0.039 Uiso calc R 1 . .
    C C7 0.0061(3) 0.71888(19) 0.75015(17) 0.0277(5) Uani d . 1 . .
    F F13 -0.34221(18) 0.86593(14) 0.91813(11) 0.0478(4) Uani d . 1 . .
    C C16 -0.0264(3) 0.3595(2) 0.06140(17) 0.0317(5) Uani d . 1 . .
    H H16A 0.0277 0.4243 0.0283 0.038 Uiso calc R 1 . .
    H H16B -0.0821 0.3451 0.0155 0.038 Uiso calc R 1 . .
    C C18 0.2008(3) 0.2659(2) 0.16117(19) 0.0381(6) Uani d . 1 . .
    H H18A 0.2588 0.3261 0.1253 0.057 Uiso calc R 1 . .
    H H18B 0.2744 0.1906 0.1866 0.057 Uiso calc R 1 . .
    H H18C 0.1366 0.2933 0.2118 0.057 Uiso calc R 1 . .
    C C17 0.0964(3) 0.24666(19) 0.09870(17) 0.0275(5) Uani d . 1 . .
    H H17 0.0413 0.1831 0.1362 0.033 Uiso calc R 1 . .
    C C15 -0.1456(3) 0.40231(19) 0.13165(17) 0.0267(5) Uani d . 1 . .
    O O19 -0.2226(2) 0.51189(14) 0.09517(12) 0.0339(4) Uani d . 1 . .
    O O20 -0.1707(2) 0.34637(14) 0.21037(13) 0.0384(4) Uani d . 1 . .
    C C21 0.1945(3) 0.2034(2) 0.01993(17) 0.0262(5) Uani d . 1 . .
    C C24 0.3719(3) 0.1207(2) -0.12071(17) 0.0283(5) Uani d . 1 . .
    C C23 0.3358(3) 0.2417(2) -0.13069(18) 0.0309(5) Uani d . 1 . .
    H H23 0.3702 0.2957 -0.1849 0.037 Uiso calc R 1 . .
    C C25 0.3252(3) 0.0405(2) -0.04406(19) 0.0343(6) Uani d . 1 . .
    H H25 0.3531 -0.0424 -0.0392 0.041 Uiso calc R 1 . .
    C C22 0.2476(3) 0.28194(19) -0.05903(17) 0.0283(5) Uani d . 1 . .
    H H22 0.2229 0.3649 -0.0638 0.034 Uiso calc R 1 . .
    C C26 0.2364(3) 0.0822(2) 0.02646(18) 0.0317(5) Uani d . 1 . .
    H H26 0.2033 0.0271 0.0804 0.038 Uiso calc R 1 . .
    F F27 0.45606(17) 0.08057(12) -0.19206(10) 0.0379(3) Uani d . 1 . .
    C C28 1.0799(3) 0.15962(19) 0.72711(18) 0.0270(5) Uani d . 1 . .
    C C29 0.9779(3) 0.24368(19) 0.77999(17) 0.0278(5) Uani d . 1 . .
    H H29A 0.9766 0.3272 0.7437 0.033 Uiso calc R 1 . .
    H H29B 1.0227 0.2296 0.8393 0.033 Uiso calc R 1 . .
    C C30 0.8103(3) 0.22530(18) 0.79922(16) 0.0261(5) Uani d . 1 . .
    H H30 0.8164 0.1381 0.8281 0.031 Uiso calc R 1 . .
    C C31 0.7275(3) 0.2613(2) 0.71044(18) 0.0322(5) Uani d . 1 . .
    H H31A 0.6255 0.2403 0.7247 0.048 Uiso calc R 1 . .
    H H31B 0.7905 0.2192 0.667 0.048 Uiso calc R 1 . .
    H H31C 0.7132 0.3476 0.6826 0.048 Uiso calc R 1 . .
    O O33 1.1259(2) 0.05065(14) 0.78089(12) 0.0324(4) Uani d . 1 . .
    O O32 1.1131(2) 0.18751(14) 0.64492(13) 0.0369(4) Uani d . 1 . .
    C C36 0.5931(3) 0.4715(2) 0.91167(18) 0.0323(6) Uani d . 1 . .
    H H36 0.5602 0.556 0.8961 0.039 Uiso calc R 1 . .
    C C37 0.5618(3) 0.4033(2) 0.99854(18) 0.0310(6) Uani d . 1 . .
    C C35 0.6742(3) 0.4147(2) 0.84630(18) 0.0295(5) Uani d . 1 . .
    H H35 0.6982 0.4609 0.7856 0.035 Uiso calc R 1 . .
    C C39 0.6848(3) 0.2257(2) 0.95806(18) 0.0316(5) Uani d . 1 . .
    H H39 0.7157 0.1411 0.9743 0.038 Uiso calc R 1 . .
    C C38 0.6044(3) 0.2812(2) 1.02468(18) 0.0340(6) Uani d . 1 . .
    H H38 0.5801 0.2362 1.0858 0.041 Uiso calc R 1 . .
    C C34 0.7208(3) 0.29051(19) 0.86877(17) 0.0268(5) Uani d . 1 . .
    F F40 0.48263(17) 0.45883(13) 1.06343(10) 0.0393(4) Uani d . 1 . .
    C C41 0.6835(3) 1.0026(2) 0.29601(18) 0.0295(6) Uani d . 1 . .
    C C42 0.8063(3) 0.9199(2) 0.25150(17) 0.0328(6) Uani d . 1 . .
    H H42A 0.7993 0.8366 0.2838 0.039 Uiso calc R 1 . .
    H H42B 0.9105 0.9287 0.2601 0.039 Uiso calc R 1 . .
    C C44 0.6310(3) 0.9352(2) 0.13051(19) 0.0343(6) Uani d . 1 . .
    H H44A 0.6248 0.9498 0.0641 0.051 Uiso calc R 1 . .
    H H44B 0.5518 0.9957 0.1527 0.051 Uiso calc R 1 . .
    H H44C 0.6128 0.8558 0.1634 0.051 Uiso calc R 1 . .
    C C43 0.7923(3) 0.94215(18) 0.14816(16) 0.0263(5) Uani d . 1 . .
    H H43 0.8069 1.0246 0.1156 0.032 Uiso calc R 1 . .
    O O45 0.6543(2) 1.11414(14) 0.24692(12) 0.0321(4) Uani d . 1 . .
    O O46 0.6199(2) 0.96748(14) 0.37227(13) 0.0394(5) Uani d . 1 . .
    C C47 0.9157(3) 0.8548(2) 0.10652(17) 0.0269(5) Uani d . 1 . .
    C C49 1.0898(3) 0.8174(2) -0.02507(19) 0.0376(6) Uani d . 1 . .
    H H49 1.1376 0.8461 -0.085 0.045 Uiso calc R 1 . .
    C C51 1.0554(3) 0.6535(2) 0.10693(19) 0.0330(6) Uani d . 1 . .
    H H51 1.0806 0.5703 0.1368 0.04 Uiso calc R 1 . .
    C C50 1.1191(3) 0.6987(2) 0.02071(19) 0.0355(6) Uani d . 1 . .
    C C48 0.9864(3) 0.8951(2) 0.01997(18) 0.0324(6) Uani d . 1 . .
    H H48 0.9644 0.9783 -0.0101 0.039 Uiso calc R 1 . .
    C C52 0.9517(3) 0.7325(2) 0.15051(18) 0.0299(5) Uani d . 1 . .
    H H52 0.9054 0.7028 0.2106 0.036 Uiso calc R 1 . .
    F F53 1.21755(19) 0.62025(14) -0.02295(11) 0.0513(4) Uani d . 1 . .
    C C56 0.3296(3) 0.91789(19) 0.60549(18) 0.0286(5) Uani d . 1 . .
    H H56 0.2435 0.9712 0.5737 0.034 Uiso calc R 1 . .
    C C55 0.4388(3) 0.84663(19) 0.55918(17) 0.0270(5) Uani d . 1 . .
    H H55 0.4291 0.8528 0.4964 0.032 Uiso calc R 1 . .
    C C54 0.5631(3) 0.76575(19) 0.60622(17) 0.0261(5) Uani d . 1 . .
    N N57 0.3404(2) 0.91472(17) 0.69307(15) 0.0292(4) Uani d . 1 . .
    C C59 0.5756(3) 0.76326(19) 0.69606(17) 0.0293(5) Uani d . 1 . .
    H H59 0.66 0.7103 0.7297 0.035 Uiso calc R 1 . .
    C C60 0.6807(3) 0.67932(18) 0.56218(17) 0.0256(5) Uani d . 1 . .
    C C58 0.4630(3) 0.8393(2) 0.73644(18) 0.0321(5) Uani d . 1 . .
    H H58 0.4732 0.838 0.7981 0.039 Uiso calc R 1 . .
    O O61 0.7261(2) 0.57619(13) 0.60912(12) 0.0329(4) Uani d . 1 . .
    N N62 0.7266(2) 0.72146(17) 0.47490(15) 0.0327(5) Uani d . 1 . .
    H H62A 0.7945 0.6747 0.4461 0.039 Uiso calc R 1 . .
    H H62B 0.6893 0.7964 0.4453 0.039 Uiso calc R 1 . .
    C C63 0.1599(3) 0.3843(2) 0.39637(17) 0.0268(5) Uani d . 1 . .
    C C64 0.1958(3) 0.26026(19) 0.42812(17) 0.0271(5) Uani d . 1 . .
    H H64 0.1306 0.2194 0.4751 0.032 Uiso calc R 1 . .
    C C65 0.3283(3) 0.19775(19) 0.38986(17) 0.0288(5) Uani d . 1 . .
    H H65 0.3519 0.1131 0.4115 0.035 Uiso calc R 1 . .
    N N66 0.4251(2) 0.25033(16) 0.32393(14) 0.0275(4) Uani d . 1 . .
    C C69 0.0169(3) 0.4603(2) 0.43378(17) 0.0265(5) Uani d . 1 . .
    C C68 0.2580(3) 0.43934(19) 0.32681(17) 0.0290(5) Uani d . 1 . .
    H H68 0.2357 0.5237 0.3028 0.035 Uiso calc R 1 . .
    C C67 0.3883(3) 0.36984(19) 0.29297(17) 0.0283(5) Uani d . 1 . .
    H H67 0.4551 0.4084 0.2456 0.034 Uiso calc R 1 . .
    N N70 -0.0309(3) 0.41651(19) 0.52141(16) 0.0298(5) Uani d . 1 . .
    O O71 -0.0483(2) 0.55708(14) 0.38345(13) 0.0380(4) Uani d . 1 . .
    C C74 0.5830(3) 0.3417(2) 0.48249(17) 0.0284(5) Uani d . 1 . .
    H H74 0.5576 0.4265 0.4621 0.034 Uiso calc R 1 . .
    C C73 0.7156(3) 0.2810(2) 0.44228(17) 0.0291(5) Uani d . 1 . .
    H H73 0.7782 0.3228 0.3941 0.035 Uiso calc R 1 . .
    C C72 0.7542(3) 0.1572(2) 0.47447(17) 0.0267(5) Uani d . 1 . .
    N N75 0.4898(2) 0.28682(17) 0.54829(14) 0.0284(4) Uani d . 1 . .
    C C78 0.8993(3) 0.0835(2) 0.43729(18) 0.0290(5) Uani d . 1 . .
    C C77 0.6581(3) 0.1000(2) 0.54287(17) 0.0284(5) Uani d . 1 . .
    H H77 0.6824 0.0155 0.5659 0.034 Uiso calc R 1 . .
    C C76 0.5259(3) 0.16707(19) 0.57756(17) 0.0290(5) Uani d . 1 . .
    H H76 0.4584 0.1273 0.6236 0.035 Uiso calc R 1 . .
    N N80 0.9477(3) 0.12419(18) 0.35041(15) 0.0317(5) Uani d . 1 . .
    O O79 0.9655(2) -0.01089(15) 0.49001(13) 0.0403(5) Uani d . 1 . .
    C C81 0.3413(3) 0.76466(18) 0.28299(17) 0.0259(5) Uani d . 1 . .
    C C83 0.5782(3) 0.61822(19) 0.28325(18) 0.0294(5) Uani d . 1 . .
    H H83 0.6679 0.5693 0.3138 0.035 Uiso calc R 1 . .
    C C82 0.4694(3) 0.68995(19) 0.32885(18) 0.0286(5) Uani d . 1 . .
    H H82 0.4819 0.6881 0.3902 0.034 Uiso calc R 1 . .
    N N84 0.5630(2) 0.61459(15) 0.19858(15) 0.0288(5) Uani d . 1 . .
    C C87 0.2240(3) 0.85298(19) 0.32462(18) 0.0292(5) Uani d . 1 . .
    C C86 0.3246(3) 0.76258(19) 0.19437(18) 0.0280(5) Uani d . 1 . .
    H H86 0.2382 0.813 0.1613 0.034 Uiso calc R 1 . .
    C C85 0.4372(3) 0.68494(19) 0.15526(17) 0.0278(5) Uani d . 1 . .
    H H85 0.4248 0.6814 0.0953 0.033 Uiso calc R 1 . .
    O O88 0.1748(2) 0.95394(14) 0.27463(13) 0.0373(4) Uani d . 1 . .
    N N89 0.1806(3) 0.81456(19) 0.41341(15) 0.0330(5) Uani d . 1 . .
    H H80A 0.886(4) 0.193(3) 0.311(2) 0.051(9) Uiso d . 1 . .
    H H80B 1.032(4) 0.080(3) 0.324(2) 0.043(8) Uiso d . 1 . .
    H H45A 0.578(5) 1.156(3) 0.281(3) 0.070(11) Uiso d . 1 . .
    H H89A 0.109(4) 0.870(3) 0.439(2) 0.058(9) Uiso d . 1 . .
    H H89B 0.209(4) 0.739(3) 0.445(2) 0.049(8) Uiso d . 1 . .
    H H33A 1.191(5) 0.006(4) 0.745(3) 0.083(13) Uiso d . 1 . .
    H H70A 0.011(3) 0.354(3) 0.558(2) 0.036(8) Uiso d . 1 . .
    H H70B -0.110(4) 0.464(3) 0.545(2) 0.046(9) Uiso d . 1 . .
    H H19A -0.300(4) 0.540(3) 0.143(2) 0.052(9) Uiso d . 1 . .
    H H5A 0.350(4) 0.366(3) 0.599(2) 0.059(10) Uiso d . 1 . .

loop_
    _atom_site_aniso_label
    _atom_site_aniso_U_11
    _atom_site_aniso_U_22
    _atom_site_aniso_U_33
    _atom_site_aniso_U_12
    _atom_site_aniso_U_13
    _atom_site_aniso_U_23
    C1 0.0292(12) 0.0270(11) 0.0296(15) -0.0010(9) -0.0024(11) -0.0111(10)
    C4 0.0310(13) 0.0396(13) 0.0407(16) -0.0061(10) 0.0021(12) -0.0178(11)
    C2 0.0282(12) 0.0308(12) 0.0381(15) -0.0007(9) 0.0013(11) -0.0165(11)
    C3 0.0317(12) 0.0225(10) 0.0315(14) -0.0044(9) 0.0055(10) -0.0078(9)
    O5 0.0342(9) 0.0241(8) 0.0324(10) 0.0002(7) 0.0019(8) -0.0086(7)
    O6 0.0434(10) 0.0279(8) 0.0319(11) 0.0013(7) 0.0057(9) -0.0062(8)
    C10 0.0260(12) 0.0440(14) 0.0286(15) 0.0029(10) -0.0007(11) -0.0189(12)
    C12 0.0322(13) 0.0251(11) 0.0332(15) 0.0024(9) -0.0040(11) -0.0059(10)
    C8 0.0361(13) 0.0266(11) 0.0291(14) -0.0059(9) -0.0009(11) -0.0087(10)
    C9 0.0377(13) 0.0255(11) 0.0429(16) -0.0001(10) -0.0068(12) -0.0160(11)
    C11 0.0306(13) 0.0396(13) 0.0232(14) -0.0036(10) -0.0022(10) -0.0045(10)
    C7 0.0301(12) 0.0248(11) 0.0290(14) -0.0026(9) -0.0031(10) -0.0111(9)
    F13 0.0423(9) 0.0574(10) 0.0391(9) 0.0090(7) 0.0033(7) -0.0263(8)
    C16 0.0339(12) 0.0284(12) 0.0286(14) 0.0018(10) 0.0008(11) -0.0104(10)
    C18 0.0323(13) 0.0488(15) 0.0346(15) 0.0002(11) -0.0018(11) -0.0218(12)
    C17 0.0280(11) 0.0219(10) 0.0285(13) 0.0003(9) 0.0013(10) -0.0075(9)
    C15 0.0278(12) 0.0238(11) 0.0262(14) 0.0005(9) -0.0033(10) -0.0081(10)
    O19 0.0353(9) 0.0268(8) 0.0297(10) 0.0057(7) 0.0039(8) -0.0069(7)
    O20 0.0430(10) 0.0274(8) 0.0313(11) 0.0066(7) 0.0041(8) -0.0034(8)
    C21 0.0240(11) 0.0283(11) 0.0263(13) 0.0000(9) -0.0036(10) -0.0118(9)
    C24 0.0255(12) 0.0310(12) 0.0279(14) 0.0006(9) 0.0030(10) -0.0155(10)
    C23 0.0303(12) 0.0305(12) 0.0294(14) -0.0043(9) 0.0028(10) -0.0089(10)
    C25 0.0388(14) 0.0240(11) 0.0381(16) -0.0013(10) 0.0028(12) -0.0131(10)
    C22 0.0293(12) 0.0233(11) 0.0303(14) -0.0019(9) 0.0006(10) -0.0093(10)
    C26 0.0367(13) 0.0223(11) 0.0292(14) -0.0008(9) 0.0002(11) -0.0030(9)
    F27 0.0404(8) 0.0369(7) 0.0353(9) -0.0002(6) 0.0059(7) -0.0191(6)
    C28 0.0259(11) 0.0248(11) 0.0296(15) -0.0008(9) -0.0033(10) -0.0100(10)
    C29 0.0291(11) 0.0243(10) 0.0305(13) -0.0010(9) -0.0018(10) -0.0125(9)
    C30 0.0288(11) 0.0204(10) 0.0278(13) -0.0022(8) 0.0011(9) -0.0089(9)
    C31 0.0296(12) 0.0366(12) 0.0319(14) -0.0036(10) 0.0014(11) -0.0163(10)
    O33 0.0377(9) 0.0258(8) 0.0269(10) 0.0043(7) -0.0007(8) -0.0079(7)
    O32 0.0459(10) 0.0266(8) 0.0284(11) 0.0035(7) 0.0038(8) -0.0062(7)
    C36 0.0363(14) 0.0257(11) 0.0326(15) -0.0007(10) -0.0024(11) -0.0100(10)
    C37 0.0276(12) 0.0352(13) 0.0290(14) 0.0015(10) 0.0006(11) -0.0156(11)
    C35 0.0342(13) 0.0241(11) 0.0268(13) -0.0030(9) 0.0031(10) -0.0073(10)
    C39 0.0317(12) 0.0251(11) 0.0317(14) 0.0022(9) 0.0005(11) -0.0070(10)
    C38 0.0344(13) 0.0339(12) 0.0256(14) 0.0010(10) 0.0006(11) -0.0049(10)
    C34 0.0262(11) 0.0247(11) 0.0296(14) -0.0026(9) -0.0026(10) -0.0100(10)
    F40 0.0387(8) 0.0444(8) 0.0337(8) 0.0027(6) 0.0036(7) -0.0220(7)
    C41 0.0348(13) 0.0237(11) 0.0264(15) 0.0025(10) -0.0050(11) -0.0077(10)
    C42 0.0381(14) 0.0283(12) 0.0257(14) 0.0059(10) -0.0034(11) -0.0087(10)
    C44 0.0287(12) 0.0291(12) 0.0465(16) -0.0008(9) -0.0031(11) -0.0171(11)
    C43 0.0302(12) 0.0202(10) 0.0263(13) -0.0027(9) -0.0021(10) -0.0055(9)
    O45 0.0371(10) 0.0247(8) 0.0278(10) 0.0025(7) 0.0033(8) -0.0081(7)
    O46 0.0506(11) 0.0251(8) 0.0308(11) 0.0049(8) 0.0058(9) -0.0060(7)
    C47 0.0256(11) 0.0266(11) 0.0294(14) -0.0024(9) -0.0023(10) -0.0118(10)
    C49 0.0322(13) 0.0490(15) 0.0256(14) 0.0027(11) 0.0013(11) -0.0130(11)
    C51 0.0379(14) 0.0254(11) 0.0369(15) 0.0008(10) -0.0087(12) -0.0144(10)
    C50 0.0337(13) 0.0390(13) 0.0335(16) 0.0068(10) -0.0047(12) -0.0210(12)
    C48 0.0284(12) 0.0318(12) 0.0313(15) 0.0009(9) -0.0018(11) -0.0068(10)
    C52 0.0300(12) 0.0284(12) 0.0310(14) -0.0051(9) -0.0004(10) -0.0096(10)
    F53 0.0479(9) 0.0544(9) 0.0456(10) 0.0202(7) -0.0046(7) -0.0310(8)
    C56 0.0278(12) 0.0206(11) 0.0329(15) -0.0011(9) 0.0002(11) -0.0056(10)
    C55 0.0303(12) 0.0234(11) 0.0256(14) -0.0040(9) 0.0002(10) -0.0068(10)
    C54 0.0259(12) 0.0197(10) 0.0314(14) -0.0038(9) 0.0009(10) -0.0075(9)
    N57 0.0316(11) 0.0222(9) 0.0315(12) -0.0024(8) 0.0012(9) -0.0087(8)
    C59 0.0303(12) 0.0241(11) 0.0313(14) 0.0002(9) -0.0043(10) -0.0086(9)
    C60 0.0286(12) 0.0208(11) 0.0257(14) -0.0013(9) -0.0035(10) -0.0066(10)
    C58 0.0345(13) 0.0289(11) 0.0323(14) -0.0006(10) -0.0038(11) -0.0123(10)
    O61 0.0376(9) 0.0214(8) 0.0323(10) 0.0021(7) 0.0000(8) -0.0053(7)
    N62 0.0399(12) 0.0211(9) 0.0290(13) 0.0056(8) 0.0026(10) -0.0075(8)
    C63 0.0307(13) 0.0240(11) 0.0254(13) -0.0004(9) -0.0065(11) -0.0091(9)
    C64 0.0299(12) 0.0246(11) 0.0236(13) -0.0026(9) 0.0012(10) -0.0065(9)
    C65 0.0366(14) 0.0210(11) 0.0261(14) -0.0010(9) -0.0025(11) -0.0069(9)
    N66 0.0318(11) 0.0238(9) 0.0262(11) -0.0012(8) -0.0035(9) -0.0095(8)
    C69 0.0305(12) 0.0220(11) 0.0262(14) -0.0018(9) -0.0039(11) -0.0082(10)
    C68 0.0374(14) 0.0214(11) 0.0274(14) -0.0038(9) -0.0033(11) -0.0077(9)
    C67 0.0320(13) 0.0249(11) 0.0264(13) -0.0047(9) 0.0026(10) -0.0082(9)
    N70 0.0323(11) 0.0228(10) 0.0275(13) 0.0045(9) -0.0006(10) -0.0065(9)
    O71 0.0444(10) 0.0270(8) 0.0305(10) 0.0089(7) -0.0001(8) -0.0057(7)
    C74 0.0326(13) 0.0231(11) 0.0266(13) -0.0001(9) -0.0036(11) -0.0073(10)
    C73 0.0340(13) 0.0259(11) 0.0253(14) -0.0017(9) 0.0000(11) -0.0089(10)
    C72 0.0309(13) 0.0251(11) 0.0244(13) -0.0015(9) -0.0038(10) -0.0107(9)
    N75 0.0313(11) 0.0257(9) 0.0282(12) 0.0007(8) -0.0049(9) -0.0123(8)
    C78 0.0350(13) 0.0230(11) 0.0262(14) 0.0005(10) -0.0029(11) -0.0082(10)
    C77 0.0346(13) 0.0213(10) 0.0276(13) -0.0018(9) -0.0040(11) -0.0074(9)
    C76 0.0338(13) 0.0249(11) 0.0294(14) -0.0058(9) -0.0025(11) -0.0096(9)
    N80 0.0332(11) 0.0241(10) 0.0306(13) 0.0044(8) 0.0015(10) -0.0075(9)
    O79 0.0477(11) 0.0300(9) 0.0282(10) 0.0131(8) -0.0022(9) -0.0044(8)
    C81 0.0290(12) 0.0190(10) 0.0284(14) -0.0044(9) 0.0004(10) -0.0067(9)
    C83 0.0276(12) 0.0233(11) 0.0320(15) 0.0016(9) -0.0021(11) -0.0062(10)
    C82 0.0306(12) 0.0246(11) 0.0282(14) -0.0026(9) 0.0000(10) -0.0079(10)
    N84 0.0304(11) 0.0200(9) 0.0332(12) -0.0019(8) 0.0027(9) -0.0086(8)
    C87 0.0285(12) 0.0230(11) 0.0322(15) 0.0004(9) -0.0001(11) -0.0082(10)
    C86 0.0268(11) 0.0213(10) 0.0354(14) -0.0020(8) -0.0043(10) -0.0089(9)
    C85 0.0318(12) 0.0236(10) 0.0282(14) -0.0050(9) 0.0009(10) -0.0100(9)
    O88 0.0426(10) 0.0259(9) 0.0318(10) 0.0084(7) 0.0030(8) -0.0069(7)
    N89 0.0374(12) 0.0251(11) 0.0284(13) 0.0058(9) 0.0005(10) -0.0074(9)

_geom_special_details                   
;
All esds (except the esd in the dihedral angle between two l.s. planes)
are estimated using the full covariance matrix.  The cell esds are taken
into account individually in the estimation of esds in distances, angles
and torsion angles; correlations between esds in cell parameters are only
used when they are defined by crystal symmetry.  An approximate (isotropic)
treatment of cell esds is used for estimating esds involving l.s. planes.
;

loop_
    _geom_bond_atom_site_label_1
    _geom_bond_atom_site_label_2
    _geom_bond_site_symmetry_2
    _geom_bond_distance
    _geom_bond_publ_flag
    C1 O6 . 1.213(3) ?
    C1 O5 . 1.318(3) ?
    C1 C2 . 1.510(3) ?
    C4 C3 . 1.528(3) ?
    C4 H4A . 0.98 ?
    C4 H4B . 0.98 ?
    C4 H4C . 0.98 ?
    C2 C3 . 1.532(3) ?
    C2 H2A . 0.99 ?
    C2 H2B . 0.99 ?
    C3 C7 . 1.526(3) ?
    C3 H3 . 1.0 ?
    O5 H5A . 1.00(4) ?
    C10 C9 . 1.353(4) ?
    C10 F13 . 1.366(3) ?
    C10 C11 . 1.380(4) ?
    C12 C11 . 1.382(4) ?
    C12 C7 . 1.383(4) ?
    C12 H12 . 0.95 ?
    C8 C7 . 1.389(3) ?
    C8 C9 . 1.394(4) ?
    C8 H8 . 0.95 ?
    C9 H9 . 0.95 ?
    C11 H11 . 0.95 ?
    C16 C15 . 1.503(3) ?
    C16 C17 . 1.524(3) ?
    C16 H16A . 0.99 ?
    C16 H16B . 0.99 ?
    C18 C17 . 1.522(4) ?
    C18 H18A . 0.98 ?
    C18 H18B . 0.98 ?
    C18 H18C . 0.98 ?
    C17 C21 . 1.520(3) ?
    C17 H17 . 1.0 ?
    C15 O20 . 1.204(3) ?
    C15 O19 . 1.315(3) ?
    O19 H19A . 1.01(4) ?
    C21 C26 . 1.390(3) ?
    C21 C22 . 1.393(3) ?
    C24 C25 . 1.360(4) ?
    C24 F27 . 1.368(3) ?
    C24 C23 . 1.377(3) ?
    C23 C22 . 1.385(3) ?
    C23 H23 . 0.95 ?
    C25 C26 . 1.381(4) ?
    C25 H25 . 0.95 ?
    C22 H22 . 0.95 ?
    C26 H26 . 0.95 ?
    C28 O32 . 1.206(3) ?
    C28 O33 . 1.318(3) ?
    C28 C29 . 1.520(3) ?
    C29 C30 . 1.536(3) ?
    C29 H29A . 0.99 ?
    C29 H29B . 0.99 ?
    C30 C34 . 1.520(3) ?
    C30 C31 . 1.525(3) ?
    C30 H30 . 1.0 ?
    C31 H31A . 0.98 ?
    C31 H31B . 0.98 ?
    C31 H31C . 0.98 ?
    O33 H33A . 0.92(4) ?
    C36 C37 . 1.361(4) ?
    C36 C35 . 1.390(4) ?
    C36 H36 . 0.95 ?
    C37 F40 . 1.370(3) ?
    C37 C38 . 1.370(3) ?
    C35 C34 . 1.395(3) ?
    C35 H35 . 0.95 ?
    C39 C34 . 1.385(4) ?
    C39 C38 . 1.394(4) ?
    C39 H39 . 0.95 ?
    C38 H38 . 0.95 ?
    C41 O46 . 1.217(3) ?
    C41 O45 . 1.307(3) ?
    C41 C42 . 1.511(3) ?
    C42 C43 . 1.531(3) ?
    C42 H42A . 0.99 ?
    C42 H42B . 0.99 ?
    C44 C43 . 1.524(3) ?
    C44 H44A . 0.98 ?
    C44 H44B . 0.98 ?
    C44 H44C . 0.98 ?
    C43 C47 . 1.526(3) ?
    C43 H43 . 1.0 ?
    O45 H45A . 0.93(4) ?
    C47 C48 . 1.376(4) ?
    C47 C52 . 1.397(3) ?
    C49 C50 . 1.365(4) ?
    C49 C48 . 1.400(4) ?
    C49 H49 . 0.95 ?
    C51 C50 . 1.360(4) ?
    C51 C52 . 1.398(3) ?
    C51 H51 . 0.95 ?
    C50 F53 . 1.376(3) ?
    C48 H48 . 0.95 ?
    C52 H52 . 0.95 ?
    C56 N57 . 1.338(3) ?
    C56 C55 . 1.386(3) ?
    C56 H56 . 0.95 ?
    C55 C54 . 1.395(3) ?
    C55 H55 . 0.95 ?
    C54 C59 . 1.378(4) ?
    C54 C60 . 1.514(3) ?
    N57 C58 . 1.339(3) ?
    C59 C58 . 1.384(3) ?
    C59 H59 . 0.95 ?
    C60 O61 . 1.230(3) ?
    C60 N62 . 1.315(3) ?
    C58 H58 . 0.95 ?
    N62 H62A . 0.88 ?
    N62 H62B . 0.88 ?
    C63 C68 . 1.387(4) ?
    C63 C64 . 1.392(3) ?
    C63 C69 . 1.514(3) ?
    C64 C65 . 1.382(3) ?
    C64 H64 . 0.95 ?
    C65 N66 . 1.339(3) ?
    C65 H65 . 0.95 ?
    N66 C67 . 1.342(3) ?
    C69 O71 . 1.237(3) ?
    C69 N70 . 1.327(3) ?
    C68 C67 . 1.380(3) ?
    C68 H68 . 0.95 ?
    C67 H67 . 0.95 ?
    N70 H70A . 0.83(3) ?
    N70 H70B . 0.89(4) ?
    C74 N75 . 1.329(3) ?
    C74 C73 . 1.386(3) ?
    C74 H74 . 0.95 ?
    C73 C72 . 1.391(3) ?
    C73 H73 . 0.95 ?
    C72 C77 . 1.377(4) ?
    C72 C78 . 1.510(3) ?
    N75 C76 . 1.343(3) ?
    C78 O79 . 1.237(3) ?
    C78 N80 . 1.313(3) ?
    C77 C76 . 1.381(3) ?
    C77 H77 . 0.95 ?
    C76 H76 . 0.95 ?
    N80 H80A . 0.96(3) ?
    N80 H80B . 0.92(3) ?
    C81 C86 . 1.386(3) ?
    C81 C82 . 1.387(3) ?
    C81 C87 . 1.508(3) ?
    C83 N84 . 1.330(3) ?
    C83 C82 . 1.381(3) ?
    C83 H83 . 0.95 ?
    C82 H82 . 0.95 ?
    N84 C85 . 1.341(3) ?
    C87 O88 . 1.232(3) ?
    C87 N89 . 1.323(3) ?
    C86 C85 . 1.386(3) ?
    C86 H86 . 0.95 ?
    C85 H85 . 0.95 ?
    N89 H89A . 0.94(3) ?
    N89 H89B . 0.88(3) ?

loop_
    _geom_angle_atom_site_label_1
    _geom_angle_atom_site_label_2
    _geom_angle_atom_site_label_3
    _geom_angle_site_symmetry_1
    _geom_angle_site_symmetry_3
    _geom_angle
    _geom_angle_publ_flag
    O6 C1 O5 . . 123.5(2) ?
    O6 C1 C2 . . 123.5(2) ?
    O5 C1 C2 . . 112.9(2) ?
    C3 C4 H4A . . 109.5 ?
    C3 C4 H4B . . 109.5 ?
    H4A C4 H4B . . 109.5 ?
    C3 C4 H4C . . 109.5 ?
    H4A C4 H4C . . 109.5 ?
    H4B C4 H4C . . 109.5 ?
    C1 C2 C3 . . 111.9(2) ?
    C1 C2 H2A . . 109.2 ?
    C3 C2 H2A . . 109.2 ?
    C1 C2 H2B . . 109.2 ?
    C3 C2 H2B . . 109.2 ?
    H2A C2 H2B . . 107.9 ?
    C7 C3 C4 . . 111.1(2) ?
    C7 C3 C2 . . 110.68(19) ?
    C4 C3 C2 . . 111.53(18) ?
    C7 C3 H3 . . 107.8 ?
    C4 C3 H3 . . 107.8 ?
    C2 C3 H3 . . 107.8 ?
    C1 O5 H5A . . 111.(2) ?
    C9 C10 F13 . . 119.5(2) ?
    C9 C10 C11 . . 122.8(2) ?
    F13 C10 C11 . . 117.7(2) ?
    C11 C12 C7 . . 121.6(2) ?
    C11 C12 H12 . . 119.2 ?
    C7 C12 H12 . . 119.2 ?
    C7 C8 C9 . . 120.3(2) ?
    C7 C8 H8 . . 119.8 ?
    C9 C8 H8 . . 119.8 ?
    C10 C9 C8 . . 118.8(2) ?
    C10 C9 H9 . . 120.6 ?
    C8 C9 H9 . . 120.6 ?
    C10 C11 C12 . . 117.7(2) ?
    C10 C11 H11 . . 121.2 ?
    C12 C11 H11 . . 121.2 ?
    C12 C7 C8 . . 118.7(2) ?
    C12 C7 C3 . . 120.6(2) ?
    C8 C7 C3 . . 120.7(2) ?
    C15 C16 C17 . . 116.2(2) ?
    C15 C16 H16A . . 108.2 ?
    C17 C16 H16A . . 108.2 ?
    C15 C16 H16B . . 108.2 ?
    C17 C16 H16B . . 108.2 ?
    H16A C16 H16B . . 107.4 ?
    C17 C18 H18A . . 109.5 ?
    C17 C18 H18B . . 109.5 ?
    H18A C18 H18B . . 109.5 ?
    C17 C18 H18C . . 109.5 ?
    H18A C18 H18C . . 109.5 ?
    H18B C18 H18C . . 109.5 ?
    C21 C17 C18 . . 110.16(19) ?
    C21 C17 C16 . . 110.72(19) ?
    C18 C17 C16 . . 111.69(19) ?
    C21 C17 H17 . . 108.0 ?
    C18 C17 H17 . . 108.0 ?
    C16 C17 H17 . . 108.0 ?
    O20 C15 O19 . . 123.3(2) ?
    O20 C15 C16 . . 126.3(2) ?
    O19 C15 C16 . . 110.4(2) ?
    C15 O19 H19A . . 109.3(19) ?
    C26 C21 C22 . . 118.1(2) ?
    C26 C21 C17 . . 120.0(2) ?
    C22 C21 C17 . . 121.86(19) ?
    C25 C24 F27 . . 119.0(2) ?
    C25 C24 C23 . . 122.9(2) ?
    F27 C24 C23 . . 118.1(2) ?
    C24 C23 C22 . . 117.8(2) ?
    C24 C23 H23 . . 121.1 ?
    C22 C23 H23 . . 121.1 ?
    C24 C25 C26 . . 118.6(2) ?
    C24 C25 H25 . . 120.7 ?
    C26 C25 H25 . . 120.7 ?
    C23 C22 C21 . . 121.4(2) ?
    C23 C22 H22 . . 119.3 ?
    C21 C22 H22 . . 119.3 ?
    C25 C26 C21 . . 121.2(2) ?
    C25 C26 H26 . . 119.4 ?
    C21 C26 H26 . . 119.4 ?
    O32 C28 O33 . . 123.1(2) ?
    O32 C28 C29 . . 124.4(2) ?
    O33 C28 C29 . . 112.4(2) ?
    C28 C29 C30 . . 111.42(18) ?
    C28 C29 H29A . . 109.3 ?
    C30 C29 H29A . . 109.3 ?
    C28 C29 H29B . . 109.3 ?
    C30 C29 H29B . . 109.3 ?
    H29A C29 H29B . . 108.0 ?
    C34 C30 C31 . . 112.21(18) ?
    C34 C30 C29 . . 110.13(18) ?
    C31 C30 C29 . . 111.9(2) ?
    C34 C30 H30 . . 107.5 ?
    C31 C30 H30 . . 107.5 ?
    C29 C30 H30 . . 107.5 ?
    C30 C31 H31A . . 109.5 ?
    C30 C31 H31B . . 109.5 ?
    H31A C31 H31B . . 109.5 ?
    C30 C31 H31C . . 109.5 ?
    H31A C31 H31C . . 109.5 ?
    H31B C31 H31C . . 109.5 ?
    C28 O33 H33A . . 108.(3) ?
    C37 C36 C35 . . 118.5(2) ?
    C37 C36 H36 . . 120.7 ?
    C35 C36 H36 . . 120.7 ?
    C36 C37 F40 . . 118.8(2) ?
    C36 C37 C38 . . 123.4(2) ?
    F40 C37 C38 . . 117.9(2) ?
    C36 C35 C34 . . 120.8(2) ?
    C36 C35 H35 . . 119.6 ?
    C34 C35 H35 . . 119.6 ?
    C34 C39 C38 . . 121.8(2) ?
    C34 C39 H39 . . 119.1 ?
    C38 C39 H39 . . 119.1 ?
    C37 C38 C39 . . 117.4(2) ?
    C37 C38 H38 . . 121.3 ?
    C39 C38 H38 . . 121.3 ?
    C39 C34 C35 . . 118.2(2) ?
    C39 C34 C30 . . 119.56(19) ?
    C35 C34 C30 . . 122.3(2) ?
    O46 C41 O45 . . 123.2(2) ?
    O46 C41 C42 . . 122.2(2) ?
    O45 C41 C42 . . 114.6(2) ?
    C41 C42 C43 . . 114.25(19) ?
    C41 C42 H42A . . 108.7 ?
    C43 C42 H42A . . 108.7 ?
    C41 C42 H42B . . 108.7 ?
    C43 C42 H42B . . 108.7 ?
    H42A C42 H42B . . 107.6 ?
    C43 C44 H44A . . 109.5 ?
    C43 C44 H44B . . 109.5 ?
    H44A C44 H44B . . 109.5 ?
    C43 C44 H44C . . 109.5 ?
    H44A C44 H44C . . 109.5 ?
    H44B C44 H44C . . 109.5 ?
    C44 C43 C47 . . 109.16(18) ?
    C44 C43 C42 . . 110.9(2) ?
    C47 C43 C42 . . 112.56(17) ?
    C44 C43 H43 . . 108.0 ?
    C47 C43 H43 . . 108.0 ?
    C42 C43 H43 . . 108.0 ?
    C41 O45 H45A . . 107.(2) ?
    C48 C47 C52 . . 118.2(2) ?
    C48 C47 C43 . . 119.6(2) ?
    C52 C47 C43 . . 122.0(2) ?
    C50 C49 C48 . . 117.2(3) ?
    C50 C49 H49 . . 121.4 ?
    C48 C49 H49 . . 121.4 ?
    C50 C51 C52 . . 118.3(2) ?
    C50 C51 H51 . . 120.9 ?
    C52 C51 H51 . . 120.9 ?
    C51 C50 C49 . . 123.6(2) ?
    C51 C50 F53 . . 118.1(2) ?
    C49 C50 F53 . . 118.3(2) ?
    C47 C48 C49 . . 122.1(2) ?
    C47 C48 H48 . . 119.0 ?
    C49 C48 H48 . . 119.0 ?
    C47 C52 C51 . . 120.6(2) ?
    C47 C52 H52 . . 119.7 ?
    C51 C52 H52 . . 119.7 ?
    N57 C56 C55 . . 122.8(2) ?
    N57 C56 H56 . . 118.6 ?
    C55 C56 H56 . . 118.6 ?
    C56 C55 C54 . . 118.9(2) ?
    C56 C55 H55 . . 120.6 ?
    C54 C55 H55 . . 120.6 ?
    C59 C54 C55 . . 118.5(2) ?
    C59 C54 C60 . . 119.7(2) ?
    C55 C54 C60 . . 121.8(2) ?
    C56 N57 C58 . . 117.7(2) ?
    C54 C59 C58 . . 118.8(2) ?
    C54 C59 H59 . . 120.6 ?
    C58 C59 H59 . . 120.6 ?
    O61 C60 N62 . . 124.7(2) ?
    O61 C60 C54 . . 118.8(2) ?
    N62 C60 C54 . . 116.48(19) ?
    N57 C58 C59 . . 123.3(2) ?
    N57 C58 H58 . . 118.3 ?
    C59 C58 H58 . . 118.3 ?
    C60 N62 H62A . . 120.0 ?
    C60 N62 H62B . . 120.0 ?
    H62A N62 H62B . . 120.0 ?
    C68 C63 C64 . . 118.3(2) ?
    C68 C63 C69 . . 119.2(2) ?
    C64 C63 C69 . . 122.4(2) ?
    C65 C64 C63 . . 118.7(2) ?
    C65 C64 H64 . . 120.7 ?
    C63 C64 H64 . . 120.7 ?
    N66 C65 C64 . . 123.4(2) ?
    N66 C65 H65 . . 118.3 ?
    C64 C65 H65 . . 118.3 ?
    C65 N66 C67 . . 117.5(2) ?
    O71 C69 N70 . . 123.8(2) ?
    O71 C69 C63 . . 120.1(2) ?
    N70 C69 C63 . . 116.1(2) ?
    C67 C68 C63 . . 119.1(2) ?
    C67 C68 H68 . . 120.5 ?
    C63 C68 H68 . . 120.5 ?
    N66 C67 C68 . . 123.0(2) ?
    N66 C67 H67 . . 118.5 ?
    C68 C67 H67 . . 118.5 ?
    C69 N70 H70A . . 127.(2) ?
    C69 N70 H70B . . 117.(2) ?
    H70A N70 H70B . . 116.(3) ?
    N75 C74 C73 . . 123.0(2) ?
    N75 C74 H74 . . 118.5 ?
    C73 C74 H74 . . 118.5 ?
    C74 C73 C72 . . 118.1(2) ?
    C74 C73 H73 . . 121.0 ?
    C72 C73 H73 . . 121.0 ?
    C77 C72 C73 . . 119.0(2) ?
    C77 C72 C78 . . 119.0(2) ?
    C73 C72 C78 . . 122.0(2) ?
    C74 N75 C76 . . 118.6(2) ?
    O79 C78 N80 . . 123.9(2) ?
    O79 C78 C72 . . 118.5(2) ?
    N80 C78 C72 . . 117.6(2) ?
    C72 C77 C76 . . 119.2(2) ?
    C72 C77 H77 . . 120.4 ?
    C76 C77 H77 . . 120.4 ?
    N75 C76 C77 . . 122.1(2) ?
    N75 C76 H76 . . 119.0 ?
    C77 C76 H76 . . 119.0 ?
    C78 N80 H80A . . 120.2(19) ?
    C78 N80 H80B . . 120.6(19) ?
    H80A N80 H80B . . 118.(3) ?
    C86 C81 C82 . . 119.2(2) ?
    C86 C81 C87 . . 118.8(2) ?
    C82 C81 C87 . . 121.9(2) ?
    N84 C83 C82 . . 122.9(2) ?
    N84 C83 H83 . . 118.5 ?
    C82 C83 H83 . . 118.5 ?
    C83 C82 C81 . . 118.5(2) ?
    C83 C82 H82 . . 120.7 ?
    C81 C82 H82 . . 120.7 ?
    C83 N84 C85 . . 118.38(19) ?
    O88 C87 N89 . . 124.8(2) ?
    O88 C87 C81 . . 118.7(2) ?
    N89 C87 C81 . . 116.5(2) ?
    C85 C86 C81 . . 118.3(2) ?
    C85 C86 H86 . . 120.9 ?
    C81 C86 H86 . . 120.9 ?
    N84 C85 C86 . . 122.7(2) ?
    N84 C85 H85 . . 118.6 ?
    C86 C85 H85 . . 118.6 ?
    C87 N89 H89A . . 116.(2) ?
    C87 N89 H89B . . 122.(2) ?
    H89A N89 H89B . . 122.(3) ?

loop_
    _geom_torsion_atom_site_label_1
    _geom_torsion_atom_site_label_2
    _geom_torsion_atom_site_label_3
    _geom_torsion_atom_site_label_4
    _geom_torsion_site_symmetry_1
    _geom_torsion_site_symmetry_2
    _geom_torsion_site_symmetry_3
    _geom_torsion_site_symmetry_4
    _geom_torsion
    _geom_torsion_publ_flag
    O6 C1 C2 C3 . . . . -72.3(3) ?
    O5 C1 C2 C3 . . . . 105.9(2) ?
    C1 C2 C3 C7 . . . . -173.7(2) ?
    C1 C2 C3 C4 . . . . -49.6(3) ?
    F13 C10 C9 C8 . . . . 179.4(2) ?
    C11 C10 C9 C8 . . . . -1.7(4) ?
    C7 C8 C9 C10 . . . . -0.1(4) ?
    C9 C10 C11 C12 . . . . 1.6(4) ?
    F13 C10 C11 C12 . . . . -179.5(2) ?
    C7 C12 C11 C10 . . . . 0.4(4) ?
    C11 C12 C7 C8 . . . . -2.1(4) ?
    C11 C12 C7 C3 . . . . 177.5(2) ?
    C9 C8 C7 C12 . . . . 1.9(3) ?
    C9 C8 C7 C3 . . . . -177.7(2) ?
    C4 C3 C7 C12 . . . . -53.7(3) ?
    C2 C3 C7 C12 . . . . 70.7(3) ?
    C4 C3 C7 C8 . . . . 125.9(2) ?
    C2 C3 C7 C8 . . . . -109.7(2) ?
    C15 C16 C17 C21 . . . . 171.9(2) ?
    C15 C16 C17 C18 . . . . -65.0(3) ?
    C17 C16 C15 O20 . . . . -14.2(4) ?
    C17 C16 C15 O19 . . . . 166.3(2) ?
    C18 C17 C21 C26 . . . . 96.8(3) ?
    C16 C17 C21 C26 . . . . -139.1(2) ?
    C18 C17 C21 C22 . . . . -81.7(3) ?
    C16 C17 C21 C22 . . . . 42.4(3) ?
    C25 C24 C23 C22 . . . . -0.2(4) ?
    F27 C24 C23 C22 . . . . 178.6(2) ?
    F27 C24 C25 C26 . . . . -178.1(2) ?
    C23 C24 C25 C26 . . . . 0.7(4) ?
    C24 C23 C22 C21 . . . . -1.2(4) ?
    C26 C21 C22 C23 . . . . 2.0(3) ?
    C17 C21 C22 C23 . . . . -179.5(2) ?
    C24 C25 C26 C21 . . . . 0.2(4) ?
    C22 C21 C26 C25 . . . . -1.5(4) ?
    C17 C21 C26 C25 . . . . 179.9(2) ?
    O32 C28 C29 C30 . . . . 99.9(3) ?
    O33 C28 C29 C30 . . . . -78.5(2) ?
    C28 C29 C30 C34 . . . . 168.04(19) ?
    C28 C29 C30 C31 . . . . -66.5(2) ?
    C35 C36 C37 F40 . . . . 179.6(2) ?
    C35 C36 C37 C38 . . . . -0.9(4) ?
    C37 C36 C35 C34 . . . . 0.8(4) ?
    C36 C37 C38 C39 . . . . 0.5(4) ?
    F40 C37 C38 C39 . . . . 180.0(2) ?
    C34 C39 C38 C37 . . . . 0.0(4) ?
    C38 C39 C34 C35 . . . . -0.1(4) ?
    C38 C39 C34 C30 . . . . 179.3(2) ?
    C36 C35 C34 C39 . . . . -0.4(4) ?
    C36 C35 C34 C30 . . . . -179.7(2) ?
    C31 C30 C34 C39 . . . . 126.8(2) ?
    C29 C30 C34 C39 . . . . -107.9(2) ?
    C31 C30 C34 C35 . . . . -53.8(3) ?
    C29 C30 C34 C35 . . . . 71.5(3) ?
    O46 C41 C42 C43 . . . . 138.9(2) ?
    O45 C41 C42 C43 . . . . -42.5(3) ?
    C41 C42 C43 C44 . . . . -55.9(3) ?
    C41 C42 C43 C47 . . . . -178.5(2) ?
    C44 C43 C47 C48 . . . . 96.5(3) ?
    C42 C43 C47 C48 . . . . -139.9(2) ?
    C44 C43 C47 C52 . . . . -78.6(3) ?
    C42 C43 C47 C52 . . . . 44.9(3) ?
    C52 C51 C50 C49 . . . . 1.3(4) ?
    C52 C51 C50 F53 . . . . -178.2(2) ?
    C48 C49 C50 C51 . . . . -0.9(4) ?
    C48 C49 C50 F53 . . . . 178.5(2) ?
    C52 C47 C48 C49 . . . . 1.2(4) ?
    C43 C47 C48 C49 . . . . -174.1(2) ?
    C50 C49 C48 C47 . . . . -0.4(4) ?
    C48 C47 C52 C51 . . . . -0.9(3) ?
    C43 C47 C52 C51 . . . . 174.4(2) ?
    C50 C51 C52 C47 . . . . -0.3(4) ?
    N57 C56 C55 C54 . . . . 1.8(4) ?
    C56 C55 C54 C59 . . . . -2.5(3) ?
    C56 C55 C54 C60 . . . . 175.8(2) ?
    C55 C56 N57 C58 . . . . 0.3(3) ?
    C55 C54 C59 C58 . . . . 1.2(4) ?
    C60 C54 C59 C58 . . . . -177.1(2) ?
    C59 C54 C60 O61 . . . . 39.3(3) ?
    C55 C54 C60 O61 . . . . -138.9(2) ?
    C59 C54 C60 N62 . . . . -140.8(2) ?
    C55 C54 C60 N62 . . . . 40.9(3) ?
    C56 N57 C58 C59 . . . . -1.7(4) ?
    C54 C59 C58 N57 . . . . 0.9(4) ?
    C68 C63 C64 C65 . . . . 0.8(3) ?
    C69 C63 C64 C65 . . . . 179.7(2) ?
    C63 C64 C65 N66 . . . . 0.4(4) ?
    C64 C65 N66 C67 . . . . -1.3(3) ?
    C68 C63 C69 O71 . . . . 29.4(3) ?
    C64 C63 C69 O71 . . . . -149.5(2) ?
    C68 C63 C69 N70 . . . . -150.5(2) ?
    C64 C63 C69 N70 . . . . 30.6(3) ?
    C64 C63 C68 C67 . . . . -1.2(3) ?
    C69 C63 C68 C67 . . . . 179.9(2) ?
    C65 N66 C67 C68 . . . . 0.9(3) ?
    C63 C68 C67 N66 . . . . 0.3(4) ?
    N75 C74 C73 C72 . . . . -1.8(4) ?
    C74 C73 C72 C77 . . . . 1.5(4) ?
    C74 C73 C72 C78 . . . . -177.9(2) ?
    C73 C74 N75 C76 . . . . 0.3(4) ?
    C77 C72 C78 O79 . . . . -31.3(3) ?
    C73 C72 C78 O79 . . . . 148.1(3) ?
    C77 C72 C78 N80 . . . . 148.8(2) ?
    C73 C72 C78 N80 . . . . -31.8(3) ?
    C73 C72 C77 C76 . . . . 0.1(3) ?
    C78 C72 C77 C76 . . . . 179.5(2) ?
    C74 N75 C76 C77 . . . . 1.5(3) ?
    C72 C77 C76 N75 . . . . -1.7(4) ?
    N84 C83 C82 C81 . . . . -2.4(4) ?
    C86 C81 C82 C83 . . . . 1.7(3) ?
    C87 C81 C82 C83 . . . . -174.9(2) ?
    C82 C83 N84 C85 . . . . 0.9(4) ?
    C86 C81 C87 O88 . . . . -38.7(3) ?
    C82 C81 C87 O88 . . . . 138.0(2) ?
    C86 C81 C87 N89 . . . . 140.8(2) ?
    C82 C81 C87 N89 . . . . -42.6(3) ?
    C82 C81 C86 C85 . . . . 0.2(3) ?
    C87 C81 C86 C85 . . . . 177.0(2) ?
    C83 N84 C85 C86 . . . . 1.3(4) ?
    C81 C86 C85 N84 . . . . -1.8(4) ?

loop_
    _geom_hbond_atom_site_label_D
    _geom_hbond_atom_site_label_H
    _geom_hbond_atom_site_label_A
    _geom_hbond_site_symmetry_A
    _geom_hbond_distance_DH
    _geom_hbond_distance_HA
    _geom_hbond_distance_DA
    _geom_hbond_angle_DHA
    _geom_hbond_publ_flag
    O19 H19A N84 1_455 1.01(4) 1.61(3) 2.598(3) 165.(3) ?
    N70 H70B O61 1_455 0.89(4) 2.07(4) 2.959(3) 174.(3) ?
    N70 H70A O32 1_455 0.83(3) 2.10(3) 2.926(3) 175.(3) ?
    O33 H33A N57 1_645 0.92(4) 1.75(4) 2.665(3) 169.(4) ?
    N89 H89A O79 1_465 0.94(3) 1.93(3) 2.870(3) 178.(3) ?
    O45 H45A N66 1_565 0.93(4) 1.73(4) 2.644(2) 169.(4) ?
    N80 H80B O88 1_645 0.92(3) 1.98(3) 2.876(3) 164.(3) ?
    N80 H80A O20 1_655 0.96(3) 2.01(3) 2.932(3) 160.(3) ?
    N62 H62A O71 1_655 0.88 2.07 2.952(3) 177.0 ?

 #===END
